# Supplementary material for: Ghd2, a CONSTANS-like gene, confers drought sensitivity through regulation of senescence in rice
Source: PubMed Central journal article supplement (PMC5066496; doi:10.1093/jxb/erw344), 2016-09-16
Supplement: supp_erw344_Supplementary_Tables_S1_S4_Figures_S1_S7.pdf [file supp_erw344_Supplementary_Tables_S1_S4_Figures_S1_S7.pdf]

## Supplementary Tables and Figures

Supplementary Table S1. Primers used in this study.

| Name                     | Forward primer                               | Reverse primer                             | Purpose                     |
|--------------------------|----------------------------------------------|--------------------------------------------|-----------------------------|
| <i>Ghd2</i> -OE          | <i>ggggtacc</i> CTGGGAGATTTCTTCT<br>GTTT     | <i>cgggatcc</i> TCGAGTCCATGAGGC<br>ATA     | Overexpression              |
| <i>Ghd2</i> -flag        | <i>ggggtacc</i> CTGGGAGATTTCTTCT<br>GTTT     | <i>cgggatcc</i> GGTGACGGCGCACGG<br>GGC     | Overexpression<br>(3×flag)  |
| <i>Ghd2</i> -sub         | <i>cgcgatcc</i> CTGGGAGATTTCTTCT<br>GTT      | <i>cgcgatcc</i> CTTGACGAACCGGC<br>CCTT     | Subcellular<br>localization |
| <i>Ghd2</i> -grna        | <i>ggca</i> ATCCTCATCGTGCTTCAAG<br>G         | <i>aaac</i> CCTTGAAGCACGATGAG<br>GAT       | CRISPR                      |
| <i>Ghd2</i> -cas-P<br>CR | TTTGTGCTGGGAGATTTCTT<br>TTTGTGCTGGGAGATTTCTT | GCCTCGTAGTTGAGCCTGA                        | PCR for<br>sequencing       |
| <i>Ghd2</i> -cas-s<br>eq | TCGGTGGAGGAGGAGGCG                           |                                            | Sequencing                  |
| <i>CAS9</i> -PCR         | GCATGAAGAGGATCGAGGAG                         | GATCTCTTGCTCGGACTTGG                       | <i>CAS9</i> detection       |
| <i>HPT</i> -PCR          | TACACAGCCATCGGTCCAGA                         | TAGGAGGGCGTGATATGTC                        | <i>HPT</i> detection        |
| <i>Ghd2</i> -probe       | ATGGTCGAAGCGCAA                              | ACAACCCCGAGTAATGG                          | Northern                    |
| <i>Ghd2</i> -BiFC        | <i>cgcgatcc</i> CTGGGAGATTTCTTCT<br>GTT      | <i>ggggtacc</i> GGTGACGGCGCACGG<br>GGC     |                             |
| GF14b-BiFC<br>C          | <i>cgggatcc</i> GGCATTGTAGAGTTT<br>TTAGAT    | <i>cgggatcc</i> CTGCCCTCGCTGGA<br>GT       |                             |
| GF14c-BiFC<br>C          | <i>cgggatcc</i> TAATCCCTTAATTGGT<br>CAAA     | <i>cgggatcc</i> CTGCCCTCGCAGGC<br>GT       | BiFC                        |
| OsARID3-<br>BiFC         | <i>cgggatcc</i> GCATCTGGATTTGAGC<br>CTA      | <i>cgggatcc</i> CATTAACCTTTGACTGC<br>TCGAA |                             |
| <i>Ghd2</i> -Y2H<br>N1   | <i>attB1</i> -TGAGCTGCAGCTCGGAGA<br>A        | <i>attB2</i> -TCGAGTCCATGAGGCAT<br>ACG     |                             |
| <i>Ghd2</i> -Y2H-<br>N2  | <i>attB1</i> -TGAGCTGCAGCTCGGAG<br>AA        | <i>attB2-ccta</i> CTCCTCCACCGACGC<br>C     |                             |
| <i>Ghd2</i> -Y2H-<br>N3  | <i>attB1</i> -TGAGCTGCAGCTCGGAG<br>AA        | <i>attB2-ccta</i> TGCGGCCGCCGCGT<br>CATC   |                             |
| <i>Ghd2</i> -Y2H-<br>N4  | <i>attB1</i> -TGAGCTGCAGCTCGGAG<br>AA        | <i>attB2-ccta</i> ATCCGGGAGCTGCT<br>GCAC   |                             |
| <i>Ghd2</i> -Y2H-<br>N5  | <i>attB1</i> -TGAGCTGCAGCTCGGAG<br>AA        | <i>attB2-ccta</i> CAGCTCGTTGCTGTC<br>GTC   | Y2H                         |
| <i>Ghd2</i> -Y2H-<br>N6  | <i>attB1</i> -TGAGCTGCAGCTCGGAG<br>AA        | <i>attB2-ccta</i> GCTGTTGGAGGCAA<br>CACC   |                             |
| <i>Ghd2</i> -Y2H-<br>C1  | <i>attB1</i> -TGAGCTGCAGCTCGGAG<br>A         | <i>attB2-ccta</i> CACCGTCATCATCCC<br>CAC   |                             |
| <i>Ghd2</i> -Y2H-<br>C1  | <i>attB1</i> -TGGGGATGATGACGGTG<br>A         | <i>attB2</i> -TCGAGTCCATGAGGCAT<br>ACG     |                             |

|                     |                                                |                                             |                             |
|---------------------|------------------------------------------------|---------------------------------------------|-----------------------------|
| Ghd2-Y2H-C2         | <i>attB1</i> -GGGTATCTCTCCCATCAT               | <i>attB2</i> -TCGAGTCCATGAGGCAT<br>ACG      |                             |
| Ghd2-Y2H-C3         | <i>attB1</i> -TGCAGGACTCGTTCTACA               | <i>attB2</i> -TCGAGTCCATGAGGCAT<br>ACG      |                             |
| Ghd2-Y2H-C4         | <i>attB1</i> -GCTTTGTCAACTTCGAAC               | <i>attB2</i> -TCGAGTCCATGAGGCAT<br>ACG      |                             |
| Ghd2-Y2H-C5         | <i>attB1</i> -CCTCATCGTGCTTCAAGG               | <i>attB2</i> -TCGAGTCCATGAGGCAT<br>ACG      |                             |
| Ghd2-Y2H-C6         | A                                              | <i>attB2</i> -TCGAGTCCATGAGGCAT<br>ACG      |                             |
| <hr/>               |                                                |                                             |                             |
| Ghd2-none           | <i>cgggatcc</i> CTGGGAGATTTCTTCT<br>GTTT       | <i>ggggatcc</i> TCGAGTCCATGAGGC<br>ATA      |                             |
| Ghd2-gal4 BD        | <i>cgggatcc</i> AGCTGCAGCTCGGAGA<br>AG         | <i>ggggatcc</i> TCGAGTCCATGAGGC<br>ATA      |                             |
| ICL-190             | <i>cccaagctt</i> GAAACGAGAACTACG<br>ACGAGC     | <i>gaagatct</i> CACGCACTGTCAACG<br>ATGAG    |                             |
| MS-190              | <i>cccaagctt</i> TCTGTGAGACAGATAG<br>GTGGA     | <i>gaagatct</i> GTGTGAGTAGAAAAT<br>GGGAGT   |                             |
| <i>OsPPDKB</i> -190 | <i>gaagatct</i> CCGTGTTTCACTGTTTC<br>CCAATGTC  | <i>gaagatct</i> CGATCTCCCCTCCAAC<br>TCCAAGC | LUC assay in<br>protoplasts |
| <i>OsAS1</i> -190   | <i>cccaagctt</i> GACAAATACGCTGAA<br>TGCATA     | <i>gaagatct</i> GCCGCGAGGATTACT<br>ACC      |                             |
| <i>OsSGR</i> -190   | <i>cccaagctt</i> CGCTCTCGTTCATCCT<br>GTT       | <i>gaagatct</i> GCCTAACAACCAAAA<br>CGACTC   |                             |
| <i>OsNYC3</i> -190  | <i>cgggatcc</i> AATCGTAGACCTCAAA<br>ACCC       | <i>cgggatcc</i> CAGGAAGAAAAAAA<br>GACATAGC  |                             |
| <i>OsPAO</i> -190   | <i>cccaagctt</i> GCCTGCACCAGGGTA<br>AAG        | <i>gaagatct</i> GAAGAAGAGAGTAGG<br>AAACGGA  |                             |
| <hr/>               |                                                |                                             |                             |
| <i>Ghd2</i> -qRT    | TTGCCTCCAACAGCAGGG                             | GCTTCGGATGAGCGCG<br>CCTCTGAATAATCCTCATCAC   |                             |
| ICL-qRT             | GACAGGGCCTGGAAGTGAGA<br>ACTTCTCCGAGTACTTTGCTCA | ATCCT<br>TCTAGTGCAAACAAACAGGA               |                             |
| MS-qRT              | TACTT                                          | ATTGT                                       |                             |
| <i>OsAS1</i> -qRT   | TGTGCCGTTCTCGACAA                              | TTCCACTCAGGGTCCATGCT                        |                             |
| <i>OsSGR</i> -qRT   | TTCGTTTGGTTGCCATGGTA                           | AGCACGCAGCGTCATTTG                          | qPCR                        |
| <i>OsNYC1</i> -qRT  | GTCGTCTGCGCATTCATAATTC                         | GGGATCATGTGCCTGGAAGA                        |                             |
| <i>OsNYC3</i> -qRT  | TGTGTGCTCCAAAGGGACAA                           | CCCTGCCTTTGGCACCTA                          |                             |
| <i>Ubi</i> -qRT     | AACCAGCTGAGGCCCAAGA                            | ACGATTGATTTAACCAGTCCA<br>TGA                |                             |

Supplementary Table S2. Public microarray results of *OsK*, *OsL*, and *OsJ* in response to drought stress treatment at 7-day-old seedling stage.

| Name       | Normal growth |             |             | Drought stress |             |             |
|------------|---------------|-------------|-------------|----------------|-------------|-------------|
|            | Replicate 1   | Replicate 2 | Replicate 3 | Replicate 1    | Replicate 2 | Replicate 3 |
| <i>OsK</i> | 277.1         | 264.6       | 332.5       | 154.2          | 139.7       | 155.4       |
| <i>OsL</i> | 156.8         | 185.6       | 209.3       | 15.2           | 18.5        | 20.9        |
| <i>OsJ</i> | 828.5         | 780         | 1075        | 373            | 319.9       | 360         |

Supplementary Table S3. Public microarray results of *OsK* in response to drought stress treatment in three rice organs.

| Organ     | Drought-1 |                 | Drought-2 |                 | Drought-3 |                 |
|-----------|-----------|-----------------|-----------|-----------------|-----------|-----------------|
|           | LogRatio  | <i>P</i> -value | LogRatio  | <i>P</i> -value | LogRatio  | <i>P</i> -value |
| Flag leaf | -0.317    | 2.35E-02        | -0.233    | 1.58E-01        | -0.805    | 2.15E-02        |
| Shoot     | -0.242    | 2.79E-01        | -0.016    | 8.49E-01        | -0.975    | 1.10E-04        |
| Panicle   | N/A       | N/A             | N/A       | N/A             | -1.221    | 3.58E-02        |

Supplementary Table S4. GO analysis of up-regulated DEGs in the *Ghd2*-OE plants during drought stress treatment.

| GO Term                                                                                | Count <sup>a</sup> | P-value  |
|----------------------------------------------------------------------------------------|--------------------|----------|
| Biological process                                                                     |                    |          |
| GO:0003333 amino acid transmembrane transport                                          | 36                 | 1.20E-06 |
| GO:0098656 anion transmembrane transport                                               | 65                 | 3.10E-06 |
| GO:0006787 porphyrin-containing compound catabolic process                             | 25                 | 3.70E-06 |
| GO:0033015 tetrapyrrole catabolic process                                              | 25                 | 3.70E-06 |
| GO:0051187 cofactor catabolic process                                                  | 28                 | 6.70E-06 |
| GO:0015849 organic acid transport                                                      | 129                | 3.80E-05 |
| GO:0046942 carboxylic acid transport                                                   | 129                | 3.80E-05 |
| GO:0015996 chlorophyll catabolic process                                               | 23                 | 6.60E-05 |
| GO:0046149 pigment catabolic process                                                   | 24                 | 7.90E-05 |
| GO:0006865 amino acid transport                                                        | 75                 | 8.90E-05 |
| Molecular function                                                                     |                    |          |
| GO:0015171 amino acid transmembrane transporter activity                               | 71                 | 6.60E-05 |
| GO:0005342 organic acid transmembrane transporter activity                             | 105                | 7.50E-05 |
| GO:0046943 carboxylic acid transmembrane transporter activity                          | 105                | 7.50E-05 |
| GO:0015293 symporter activity                                                          | 126                | 0.00023  |
| GO:0008514 organic anion transmembrane transporter activity                            | 131                | 0.0003   |
| GO:0015294 solute:cation symporter activity                                            | 37                 | 0.00045  |
| GO:0016746 transferase activity, transferring acyl groups                              | 344                | 0.00056  |
| GO:0008509 anion transmembrane transporter activity                                    | 200                | 0.00078  |
| GO:0016798 hydrolase activity, acting on glycosyl bonds                                | 363                | 0.00087  |
| GO:0016747 transferase activity, transferring acyl groups other than amino-acyl groups | 308                | 0.00089  |
| Cellular component                                                                     |                    |          |
| GO:0000329 fungal-type vacuole membrane                                                | 14                 | 0.00015  |
| GO:0000324 fungal-type vacuole                                                         | 15                 | 0.00019  |
| GO:0009570 chloroplast stroma                                                          | 331                | 0.00024  |
| GO:0009532 plastid stroma                                                              | 335                | 0.00026  |
| GO:0000322 storage vacuole                                                             | 17                 | 0.00028  |
| GO:0044434 chloroplast part                                                            | 651                | 0.00151  |
| GO:0009536 plastid                                                                     | 1784               | 0.00202  |
| GO:0044435 plastid part                                                                | 686                | 0.0024   |
| GO:0009507 chloroplast                                                                 | 1755               | 0.00349  |
| GO:0000323 lytic vacuole                                                               | 88                 | 0.00478  |

Note: The listed terms is top ten overrepresented GO terms according to the *P*-value.

<sup>a</sup> The number of differential expressed genes fall in each GO in the *Ghd2*-overexpressing lines.

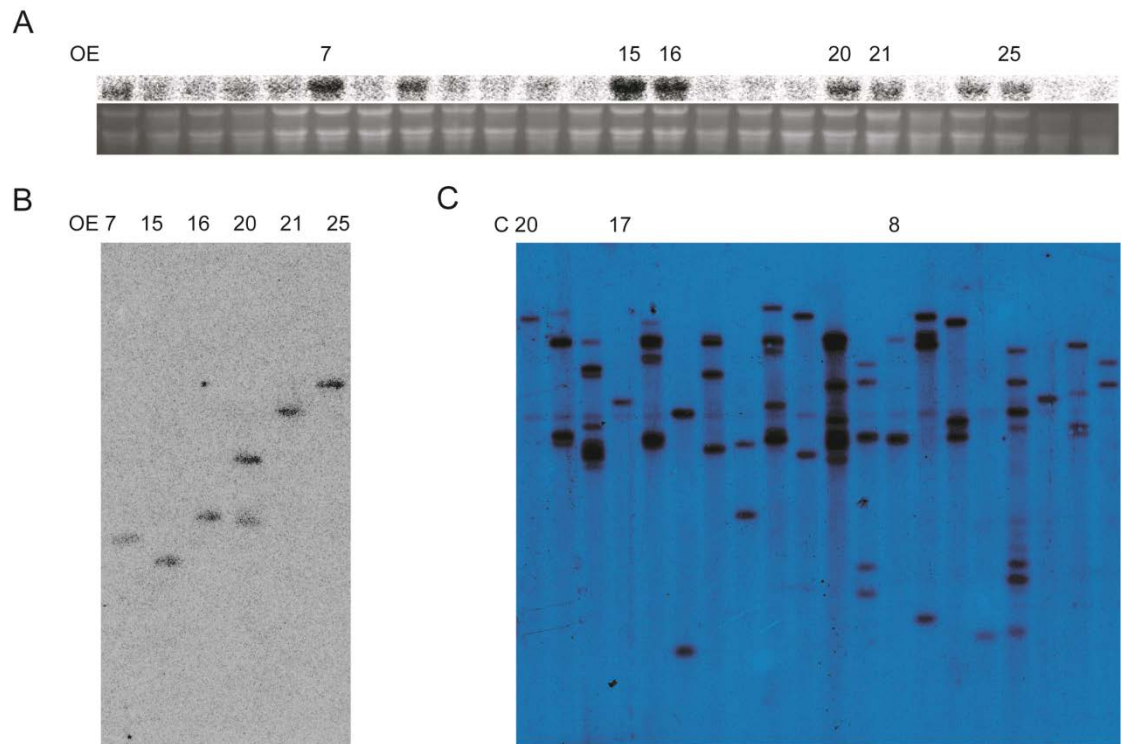

Supplementary Figure S1. Expression level and copy number detection by Northern and Southern blot respectively. Southern blot analysis used hygromycin resistance gene as a probe. (A) The *Ghd2*-OE lines were identified by Northern blot analysis. (B) Copy number of the *Ghd2*-OE lines detected by Southern blot analysis. (C) Copy number detection of the *Ghd2*-CRISPR lines by Southern blot analysis. Probes of (A) and (B) were radio-labeled, and probe for (C) was digoxigenin-labeled.

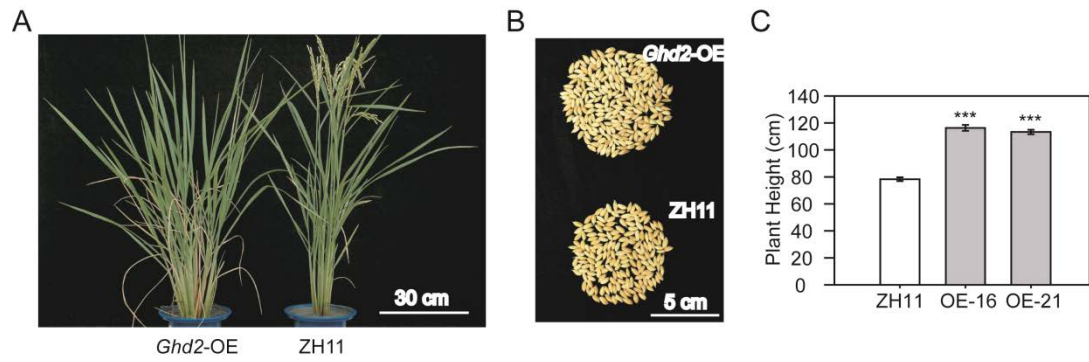

Supplementary Figure S2. Phenotypes of the *Ghd2*-OE plants with respect to grain number, plant height, and heading date. (A) Phenotypes of the *Ghd2*-OE and ZH11 plants on heading date. (B) Phenotypes of the *Ghd2*-OE and ZH11 plants on grain number per main panicle. (C) Plant height of the *Ghd2*-OE and ZH11 plants. Data represent the mean  $\pm$  SE (n=9). \*\*\* $P$ <0.005,  $t$ -test.

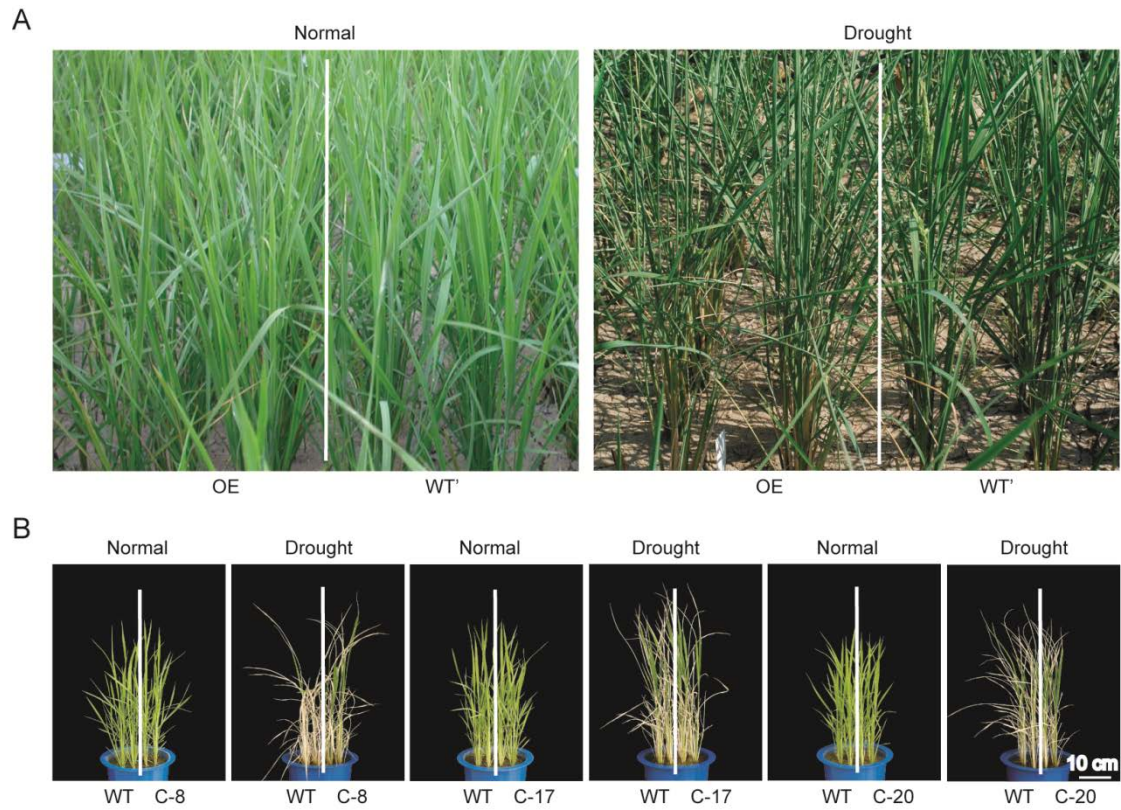

Supplementary Figure S3. Phenotypes of the *Ghd2*-OE plants at 60 DAG and the *Ghd2*-CRISPR plants at the seedling stage under drought stress treatment. (A) Phenotypes of the *Ghd2*-OE21 plants at 60 DAG under drought stress treatment in the field. (B) Phenotypes of the *Ghd2*-CRISPR plants at the seedling stage under drought stress treatment.

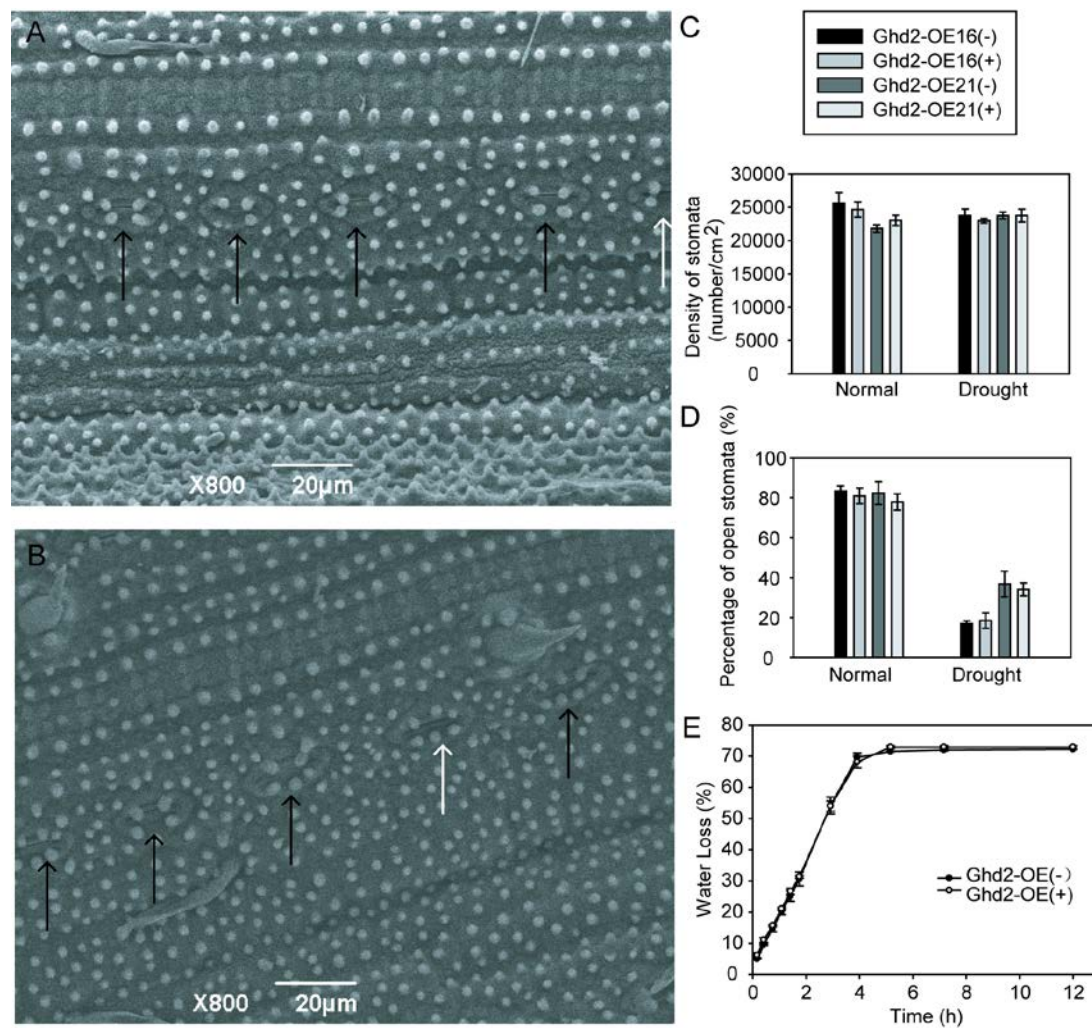

Supplementary Figure S4. Stomata and water loss rate in the *Ghd2*-OE and WT' plants. (A-B), SEM images of the *Ghd2*-OE (A) and WT' (B) plant leaves under drought stress. The open and closed stomata are indicated by white and black arrows respectively. (C-D), Stomata density (C) and percentage of open stomata (D) in the overexpression (*Ghd2*-OE (+)) and WT' control (*Ghd2*-OE (-)) plant leaves under drought stress. (E) Water loss rate in detached rice leaves of the *Ghd2*-OE and WT' control plants (n=3).



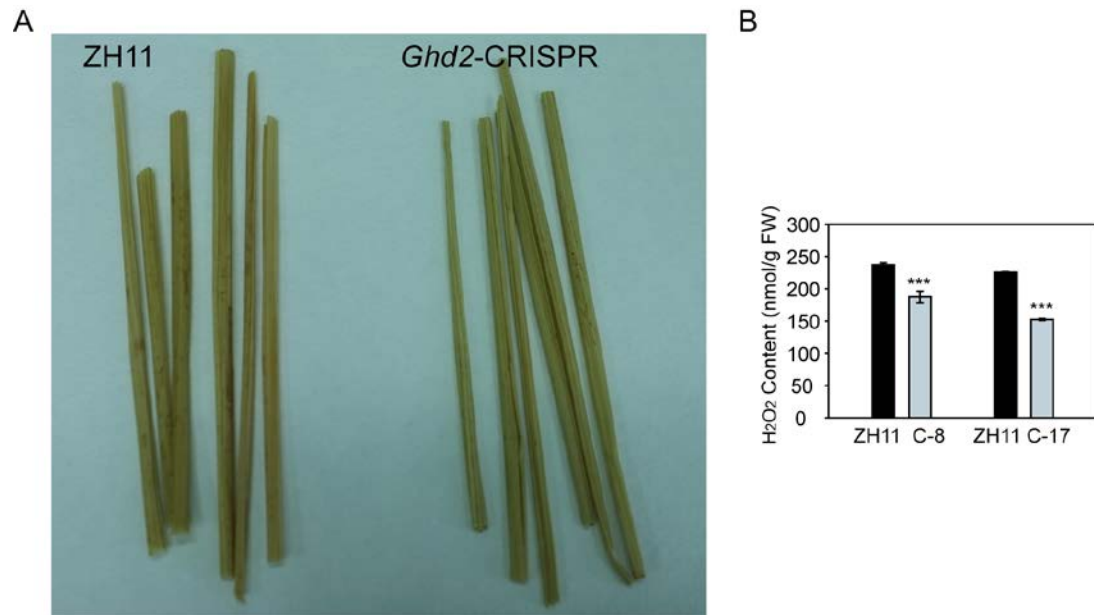

Figure S5. H<sub>2</sub>O<sub>2</sub> content in the *Ghd2*-CRISPR and WT plants under the drought stress treatment. (A) DAB staining of leaves in the *Ghd2*-CRISPR and ZH11 plants during the drought stress. (B) H<sub>2</sub>O<sub>2</sub> content measurement in the leaves of the *Ghd2*-CRISPR lines (C-8 and C-17) and ZH11 plants during the drought stress. \*\*\* $P < 0.005$ ,  $t$ -test. FW, Fresh Weight.

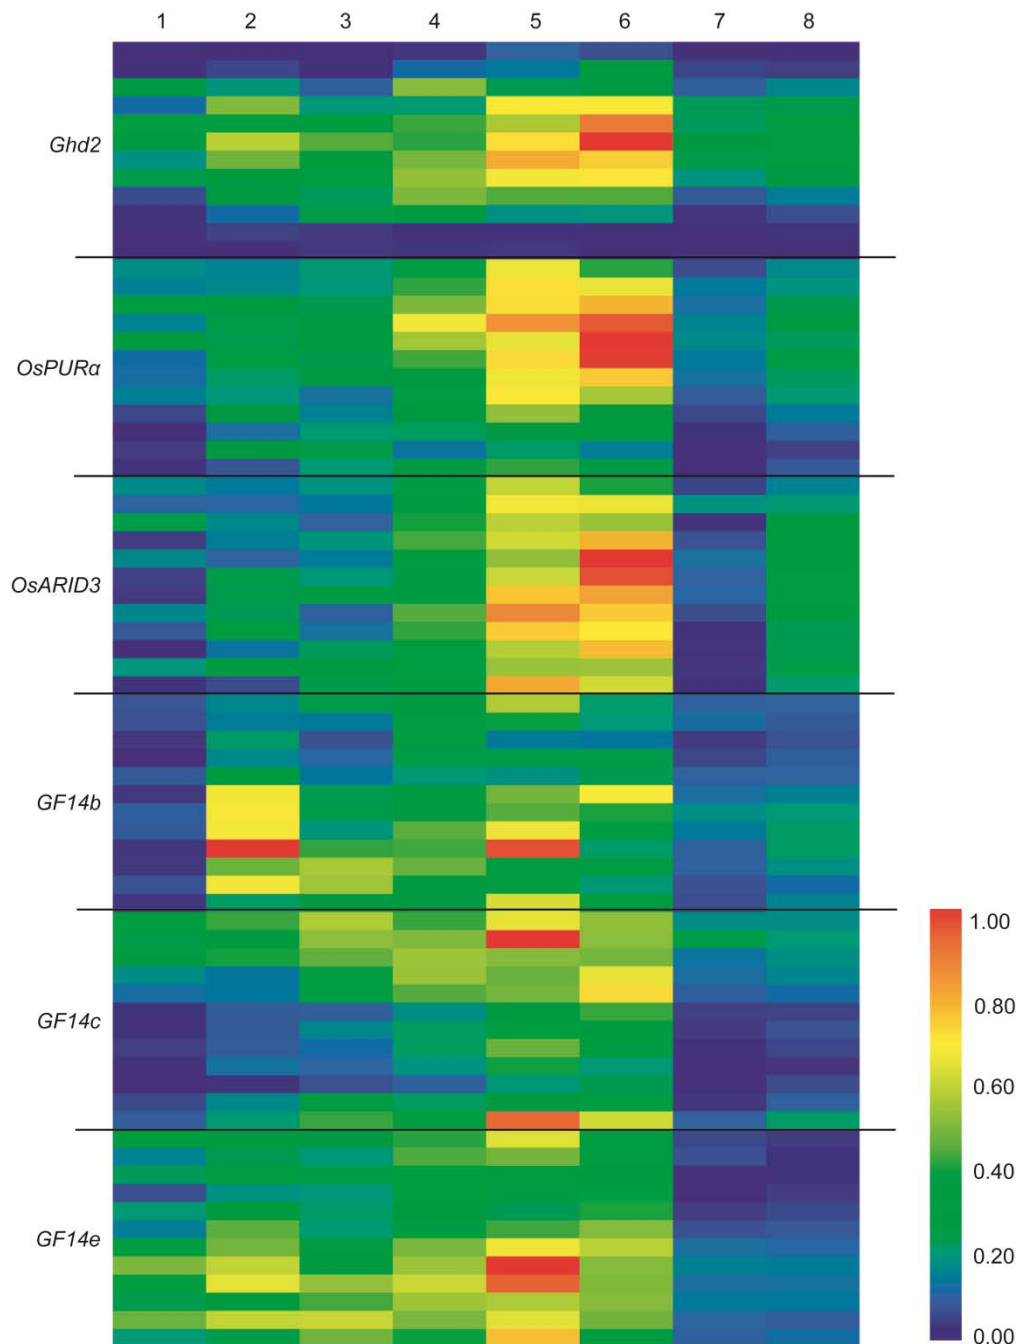

Supplementary Figure S6. Diurnal expression levels of *Ghd2*, *OsPURA*, *OsARID3*, and *14-3-3s* in rice leaves at different developmental stages. Numbers from 1 to 8 in the *x*-axis refer to “vegetative 1”, “vegetative 2”, “vegetative 3”, “vegetative reproductive”, “reproductive 1”, “reproductive ripening”, “ripening 1”, “ripening 2”, respectively (as named in the website), and the *y*-axis indicates time points of each gene from am10:00 to am 8:00. Original data was obtained from rice expression database (<http://ricexpro.dna.affrc.go.jp/>) and analyzed using Heatmap Illustrator.

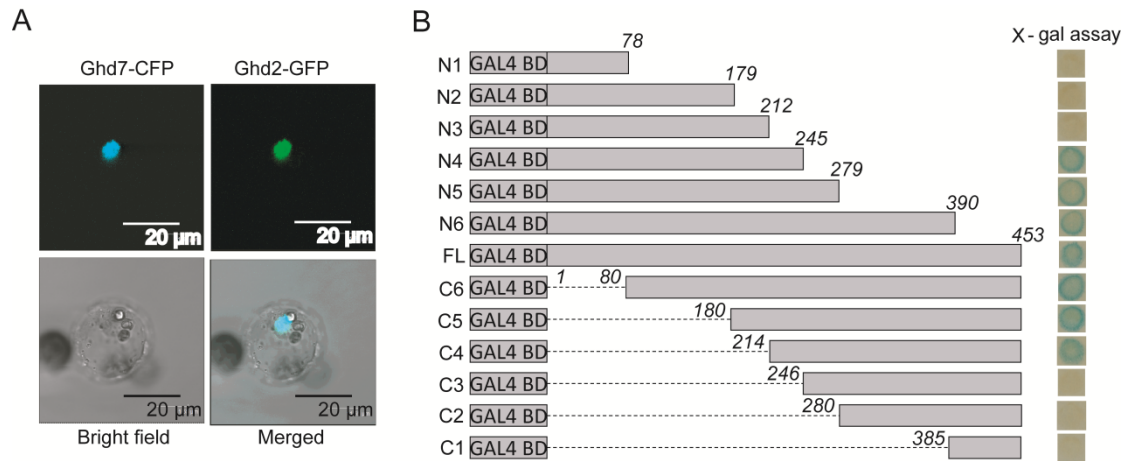

Supplementary Figure S7. Ghd2 is located in the nucleus and functions as a transcriptional activator. (A) Nuclear localization of Ghd2 in rice protoplast. Nuclear localized CCT domain containing protein Ghd7 was used as a maker to show the nucleus. (B) The activation assay of a series of deletion mutants of Ghd2 in yeast to show the transactivation activity.
